# Supplementary material for: Construction of two Zn(ii)/Cd(ii) multifunctional coordination polymers with mixed ligands for catalytic and sensing properties
Source: Royal Society of Chemistry journal article supplement (doi:10.1039/c8nj02055h), 2018-01-01

## Electronic Supplementary Information

# Construction of two Zn(II)/Cd(II) multifunctional coordination polymers with mixed ligands for catalytic and sensing properties

Li-Ping Xue, Zhao-Hao Li, Ting Zhang, Jia-Jia Cui, Yue Gao, Jia-Xin Yao

**Table S1** Selected bond distances (Å) and angles (°) for complexes 1–2.

| Compound 1 <sup>a</sup> |            |                    |            |                     |            |
|-------------------------|------------|--------------------|------------|---------------------|------------|
| Zn(1)–O(1)              | 1.996(2)   | Zn(1)–O(2)         | 2.105(3)   | Zn(1)–O(5)#1        | 2.022(2)   |
| Zn(1)–N(1)              | 2.109(3)   | Zn(1)–N(4)#2       | 2.123(3)   |                     |            |
| O(1)–Zn(1)–O(2)         | 88.10(10)  | O(1)–Zn(1)–O(5) #1 | 171.74(11) | O(1)–Zn(1)–N(1)     | 93.15(11)  |
|                         | 94.07(11)  | N(1)–Zn(1)–O(2)    | 153.52(12) | O(2)–Zn(1)–N(4)#2   | 106.11(12) |
| O(5)#1–Zn(1)–O(2)       | 83.87(11)  | O(5)#1–Zn(1)–N(1)  | 93.16(12)  | O(5)#1–Zn(1)–N(4)#2 | 90.06(12)  |
| N(1)–Zn(1)–N(4)#2       | 100.18(12) |                    |            |                     |            |

<sup>a</sup> Symmetry codes: #1 x+1/2, 1/2-y, z+1/2; #2 1/2-x, y-1/2, 1/2-z.

| Compound 2 <sup>b</sup> |          |                   |          |                    |          |
|-------------------------|----------|-------------------|----------|--------------------|----------|
| Cd(1)–O(1)              | 2.395(8) | Cd(1)–O(2)        | 2.281(7) | Cd(1)–O(3)#1       | 2.313(7) |
| Cd(1)–O(6)              | 2.391(8) | Cd(1)–N(1)        | 2.342(9) | Cd(1)–N(3)         | 2.335(9) |
| O(1)–Cd(1)–O(2)         | 78.6(2)  | O(2)–Cd(1)–O(3)#1 | 157.3(3) | O(2)–Cd(1)–O(6)    | 77.0(3)  |
| O(2)–Cd(1)–N(1)         | 94.7(3)  | O(2)–Cd(1)–N(3)   | 92.5(3)  | O(3)#1–Cd(1)–O(1)  | 123.9(3) |
| O(3)#1–Cd(1)–O(6)       | 80.7(3)  | O(3)#1–Cd(1)–N(1) | 90.6(3)  | O(3) #1–Cd(1)–N(3) | 86.4(3)  |
| O(6)–Cd(1)–O(1)         | 155.5(3) | O(1)–Cd(1)–N(1)   | 86.3(3)  | N(1)–Cd(1)–O(6)    | 93.7(3)  |
| N(3)–Cd(1)–O(1)         | 85.6(3)  | N(3)–Cd(1)–O(6)   | 97.4(3)  | N(1)–Cd(1)–N(3)    | 167.9(3) |

<sup>b</sup>Symmetry codes: #1 x-1, y, z.

**Table S2** Hydrogen Bond Lengths (Å) and Bond Angles (°) in Compound 2.

| Compound 2 <sup>a</sup>         |        |          |          |        |
|---------------------------------|--------|----------|----------|--------|
| D–H···A                         | d(D–H) | d(H···A) | d(D···A) | <(DHA) |
| O(6)–H(1W)···O(7)               | 0.851  | 1.955    | 2.762    | 157.99 |
| O(6)–H(2W)···O(8) <sup>#2</sup> | 0.851  | 2.244    | 2.854    | 128.74 |
| O(7)–H(3W)···O(4) <sup>#3</sup> | 0.850  | 2.263    | 2.933    | 135.83 |
| O(7)–H(4W)···O(2)               | 0.850  | 2.307    | 2.820    | 119.08 |

<sup>a</sup>Symmetry codes: (#2) -x+1/2, y-1/2, -z+3/2; (#3) x-1/2, -y+3/2, z+1/2.

Fig. S1 PXRD patterns of as-synthesized and simulated 1-2.

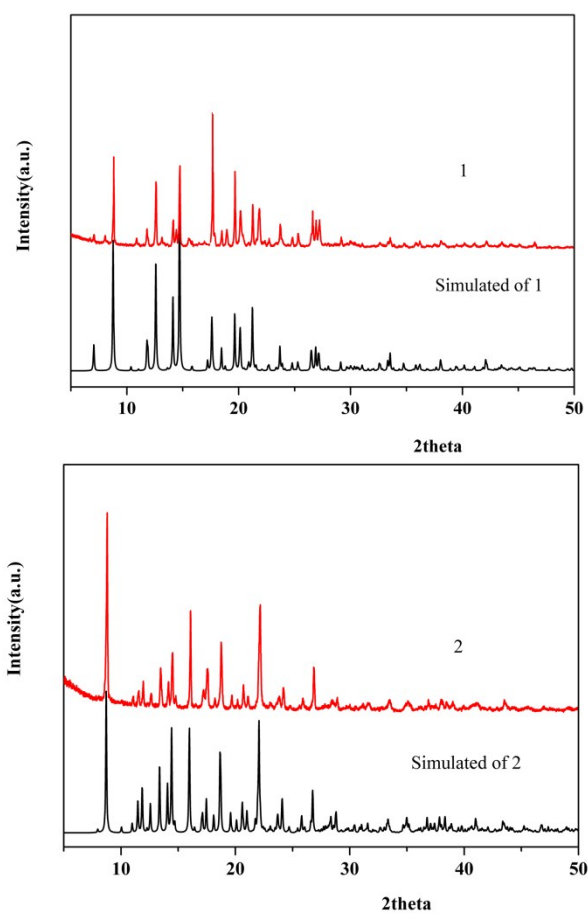

Fig. S2 TG curves of complexes 1-2.

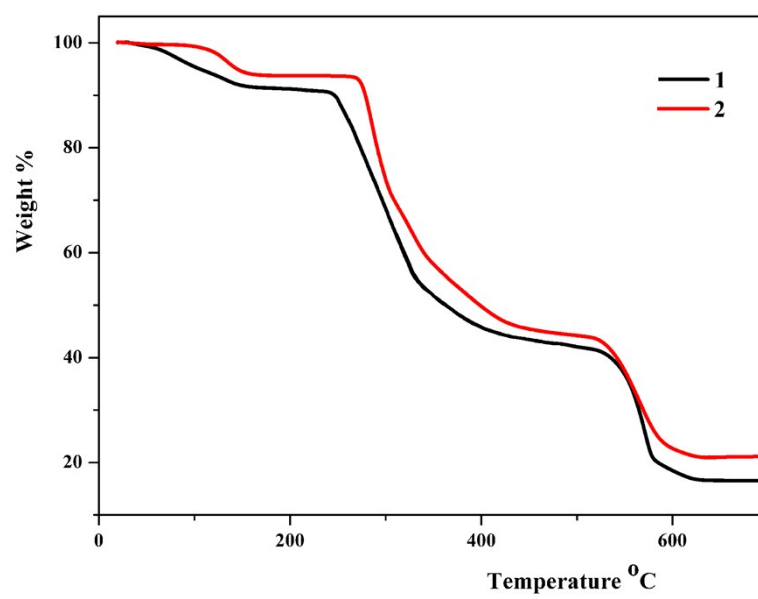

Fig. S3 The reaction time examination and leaching test in the Knoevenagel condensation.

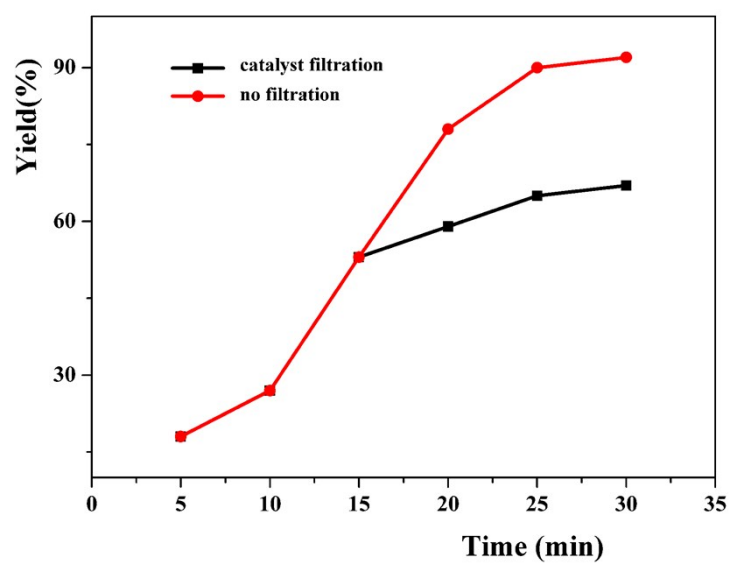

Fig. S4 PXRD patterns for as-synthesized and reused compound 1 in the Knoevenagel condensation.

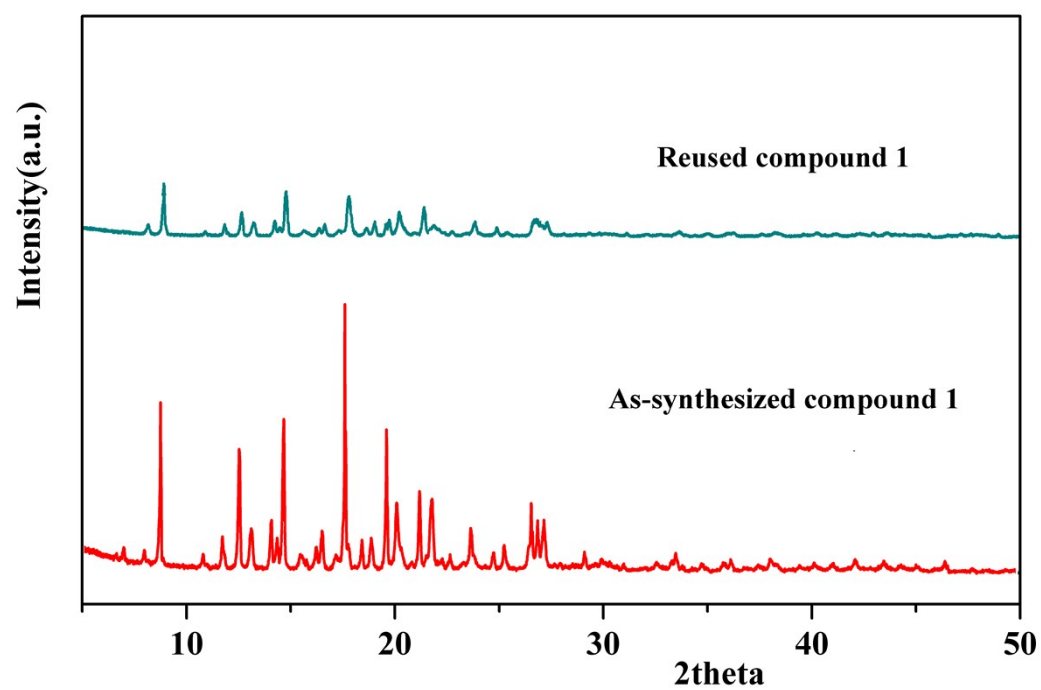

Fig. S5 The luminescent intensities of compound 1 upon the addition of various amino acids when excited at 290 nm at room temperature

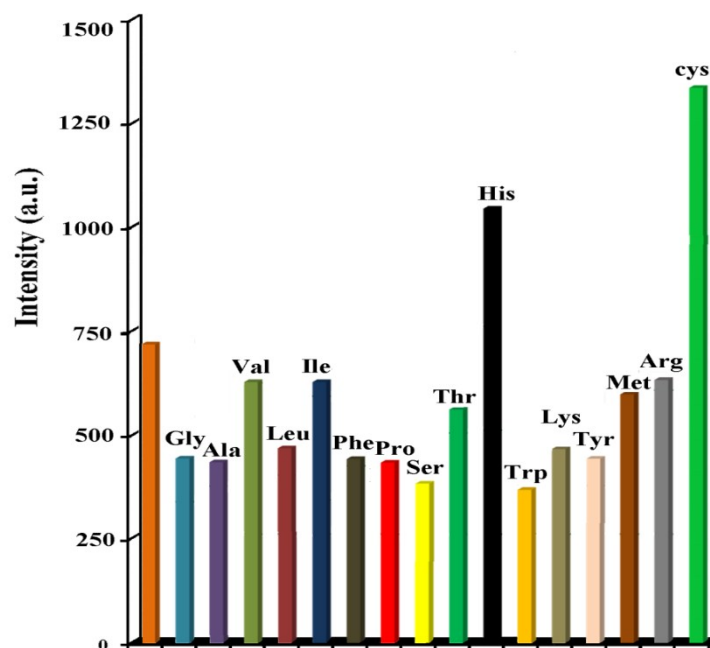

Fig. S6 PXRD patterns for as-synthesized and compound 2 after sensing of Cys.

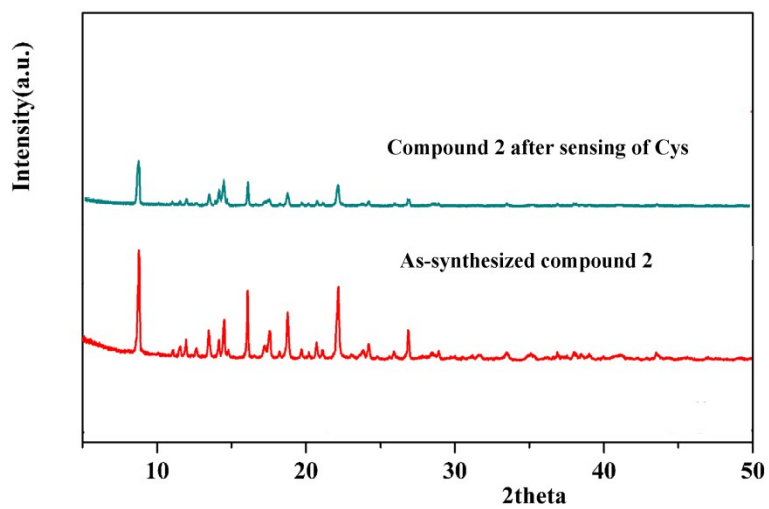

Fig. S7 IR spectra for as-synthesized and compound 2 after sensing of Cys.

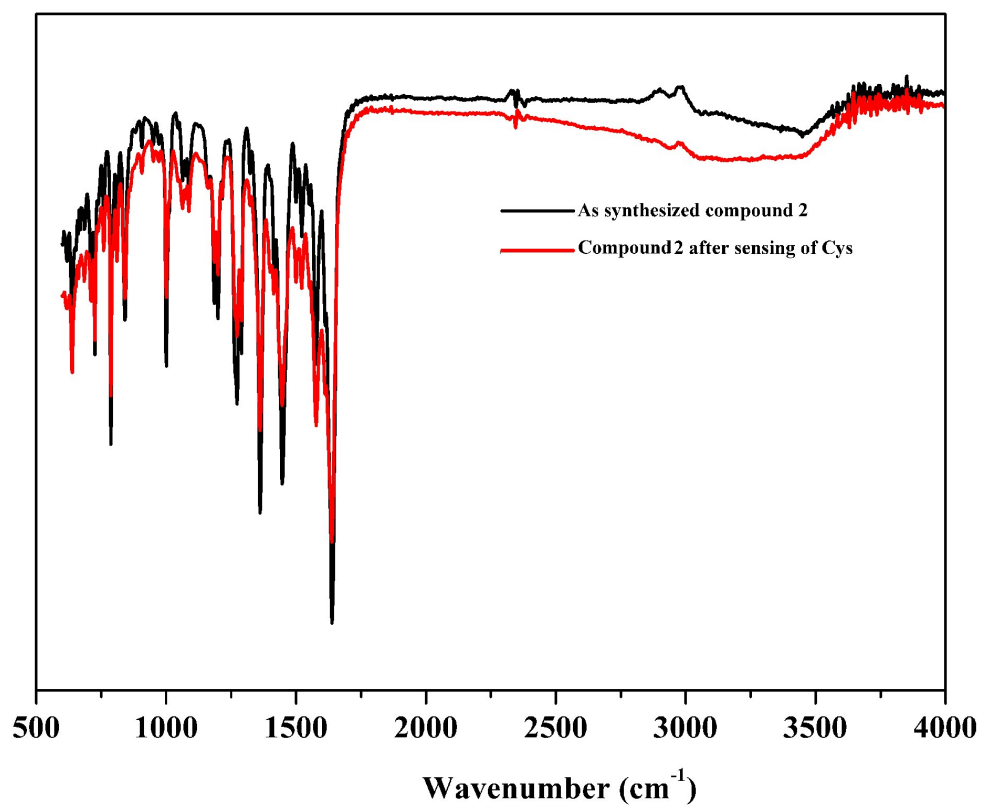

### $^1\text{H}$ -NMR Spectra of All Compounds

2-(Phenylmethylene)malononitrile. White solid;  $^1\text{H}$  NMR ( $\text{CDCl}_3$ , 300 MHz):

$\delta$  (ppm): 7.91 (d,  $J = 7.6$  Hz, 2H), 7.80 (s, 1H), 7.63 (t,  $J = 7.4$  Hz, 1H), 7.55 (t,  $J = 7.7$  Hz, 2H).

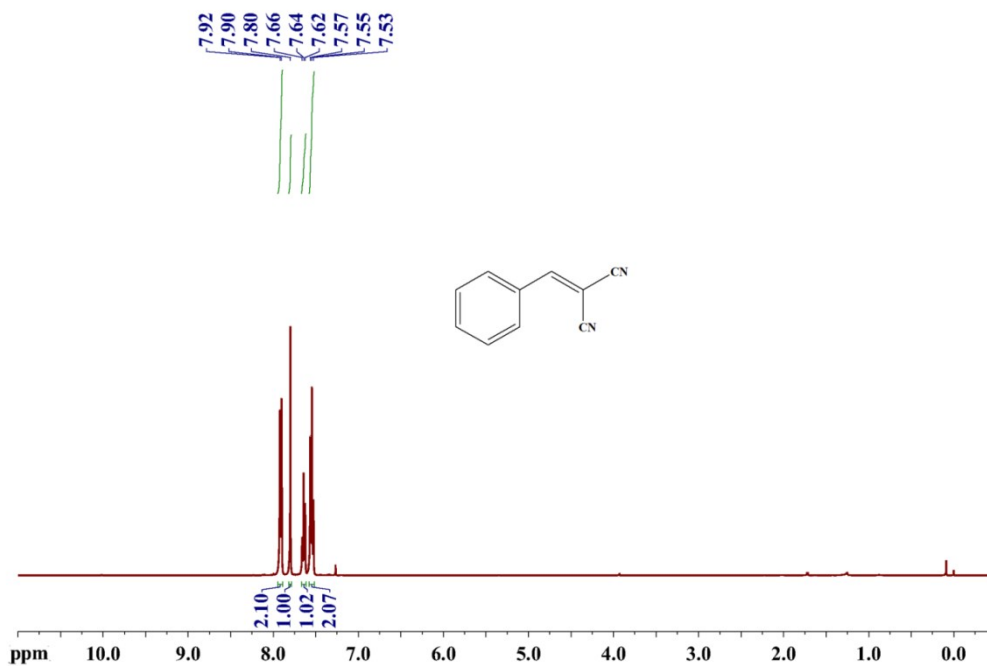

2-(4-Bromophenylmethylene)malononitrile. White solid;  $^1\text{H}$  NMR ( $\text{CDCl}_3$ , 300

MHz):  $\delta$  (ppm): 7.79-7.68 (m, 5H).

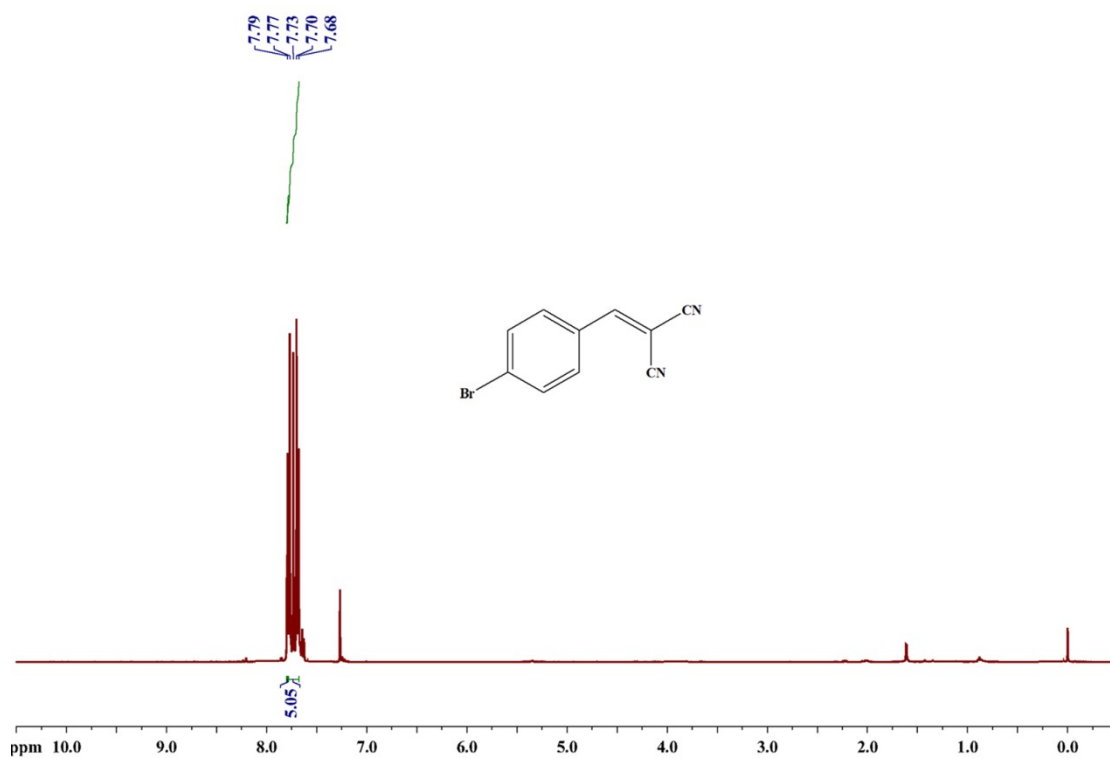

2-(4-Fluorophenylmethylene)malononitrile. White solid;  $^1\text{H NMR}$  (CDCl<sub>3</sub>, 500 MHz):  $\delta$ (ppm): 7.99-7.95 (m, 2H), 7.76 (s, 1H), 7.26-7.22 (m, 2H).

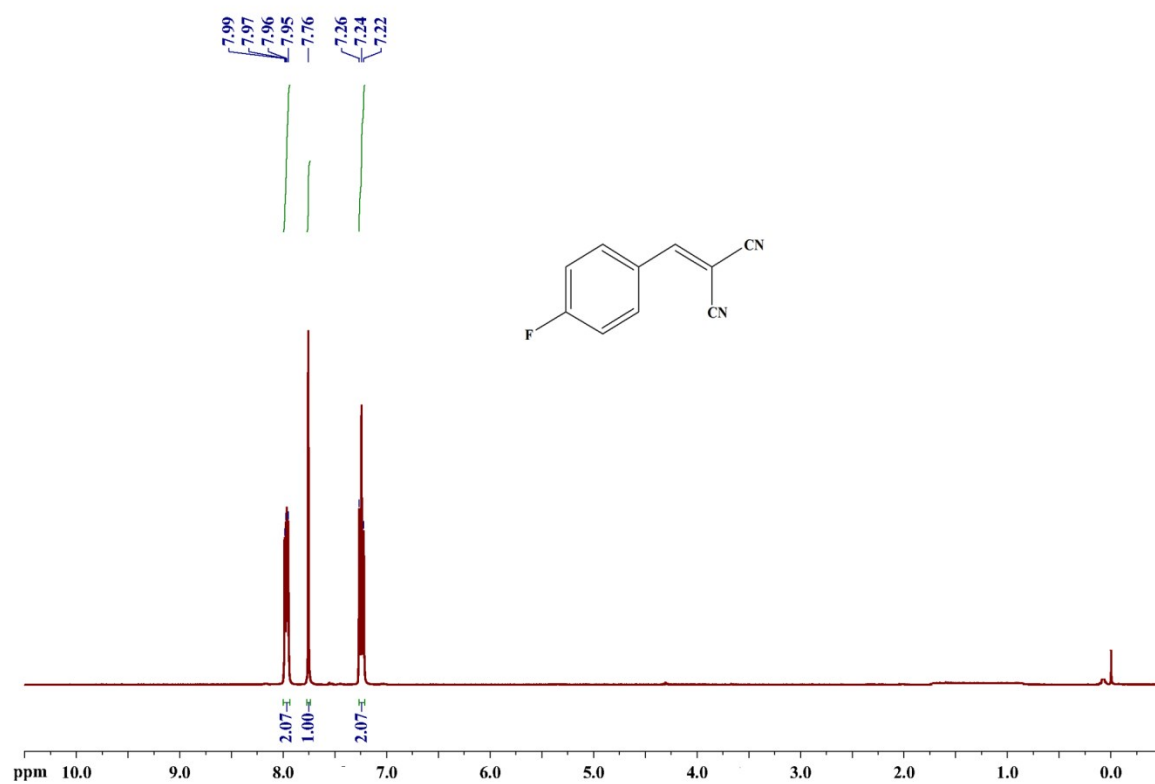

2-(4-Nitrophenylmethylene)malononitrile. Yellow solid;  $^1\text{H NMR}$  (CDCl<sub>3</sub>, 500 MHz):  $\delta$ (ppm): 8.41 (d,  $J = 8.6$ , 2H), 8.10 (d,  $J = 8.5$ , 2H), 7.92 (s, 1H).

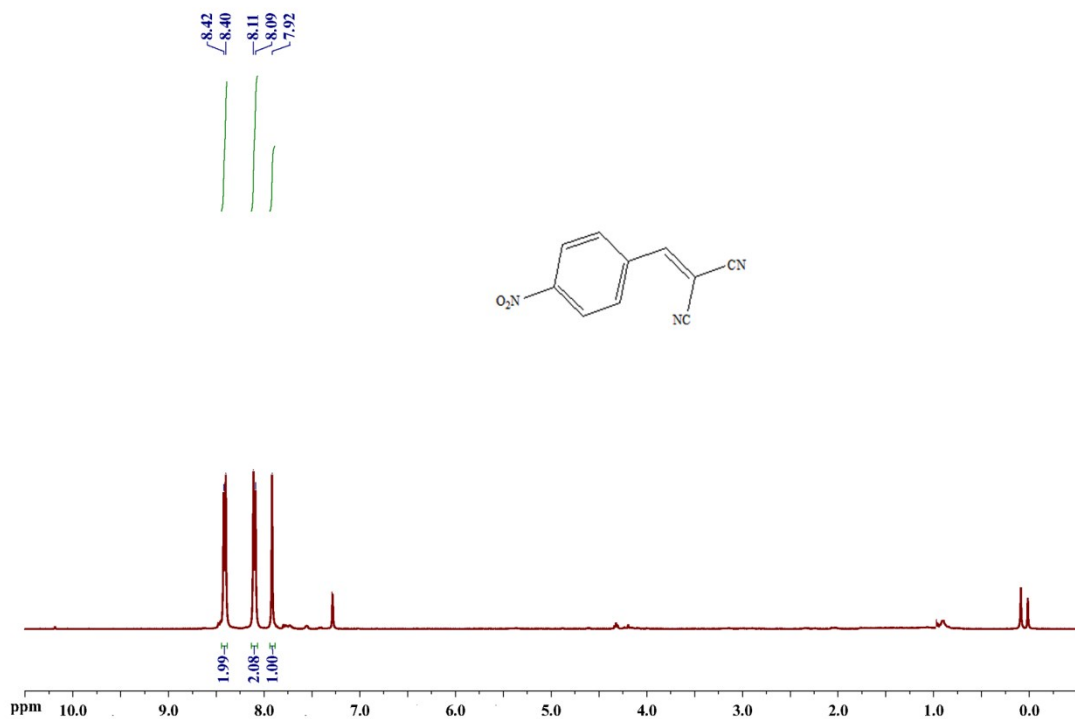

2-(4-Methylphenylmethylene)malononitrile. White solid; <sup>1</sup>H NMR (CDCl<sub>3</sub>, 300 MHz): δ (ppm): 7.81 (d, J = 8.3, 2H), 7.72 (s, 1H), 7.34 (d, J = 8.2, 2H), 2.46 (s, 3H).

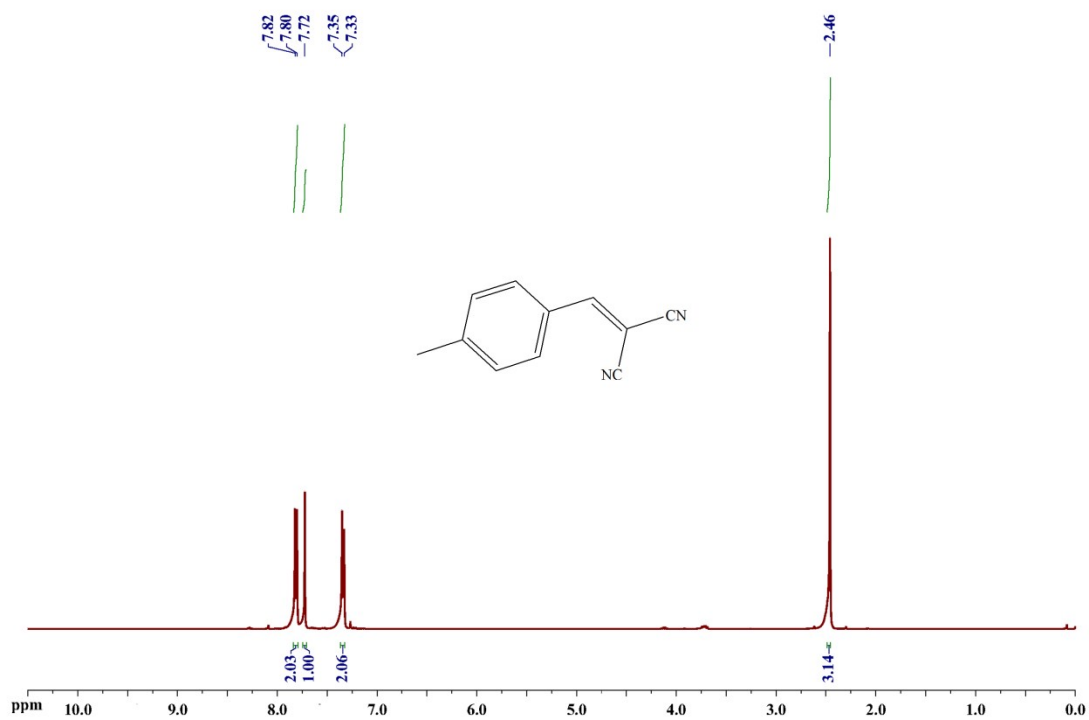

2-(2-Fluorophenylmethylene)malononitrile. White solid; <sup>1</sup>H NMR (CDCl<sub>3</sub>, 300 MHz): δ (ppm): 8.27-8.931(m, 1H), 8.11 (s, 1H), 7.62-7.68 (m, 1H), 7.32-7.36(m, 1H), 7.21-



7.36(m, 1H).

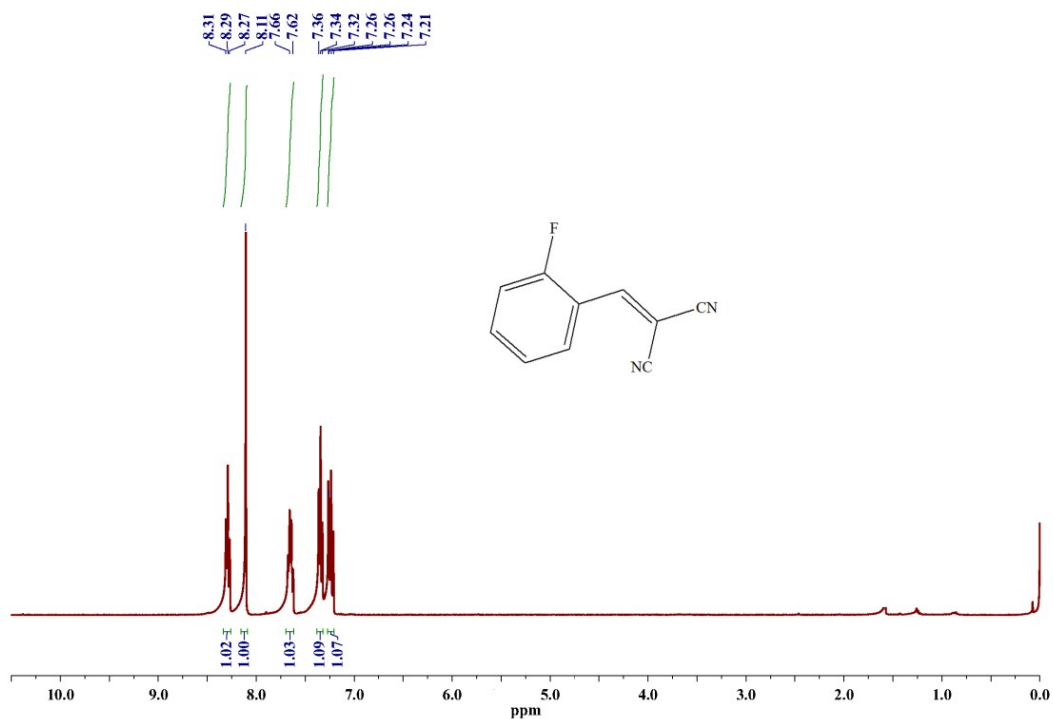

2-(3-Fluorophenylmethylene)malononitrile. White solid; <sup>1</sup>H NMR (CDCl<sub>3</sub>, 300 MHz): δ(ppm): 7.76 (s, 1H), 7.62-7.69 (m, 2H), 7.57-7.52 (m, 1H), 7.37-7.32(m, 1H).

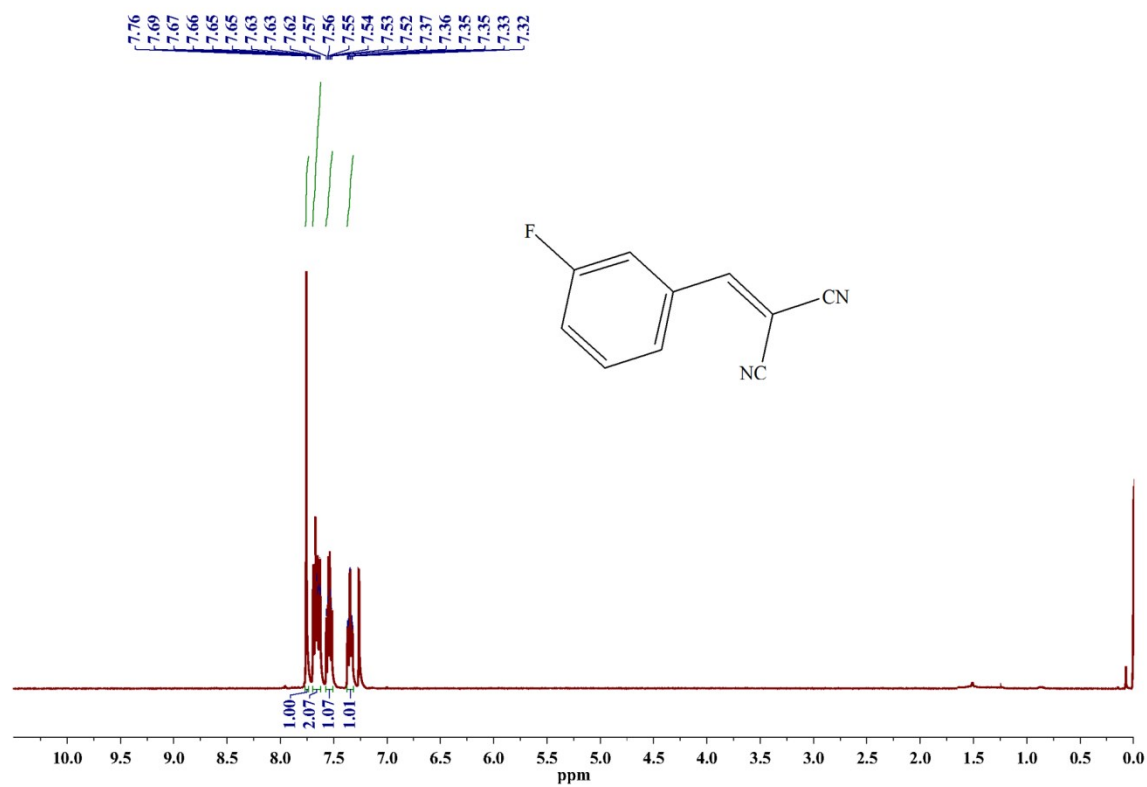

Supplement: c8nj02055h1.pdf [file c8nj02055h1.pdf]
